# INFOGRAPHICS IN ANESTHESIOLOGY

Complex Information for Anesthesiologists Presented Quickly and Clearly

## Taking the Temperature on Platelet Storage

Platelets are commonly stored at room temperature (22°C), which preserves normal life span after transfusion but degrades their hemostatic effect.<sup>1</sup> This is effective for thrombocytopenic patients but may not be ideal for other patients.

1st successful human blood transfusion<sup>2</sup> 1888

1st transfusion with type and crossmatch 1907

Rh group discovered 1939

Platelets reduce bleeding mortality in cancer patients 1961

Cold-stored (22°C) platelets perform better than room temperature in thrombocytopenic patients 1973

Better bacteriologic safety and hemostatic effect shown for cold-stored platelets 2014

1900 ABO blood types discovered

1910 Platelet transfusions decrease bleeding risk<sup>3</sup>

1940 U.S. starts blood collection program

1969 Room temperature platelet storage for 3 days achieved

1974 Cold-stored platelets perform better in aspirin-treated volunteers

2004 FDA clears platelets for 7-day storage with bacterial testing

2020 Clinical trial feasibility of cold-stored platelets demonstrated in a study of 65 complex cardiothoracic patients<sup>4</sup>

While *in vitro* and clinical studies show hemostatic superiority of cold-stored platelets, larger randomized controlled trials are needed to assess efficacy and safety for surgical and trauma usage.

FDA, Food and Drug Administration.

Infographic created by Jonathan P. Wanderer, Vanderbilt University Medical Center, and James P. Rathmell, Brigham and Women's Health Care/Harvard Medical School.

Illustration by Annemarie Johnson, Vivo Visuals. Address correspondence to Dr. Wanderer: jon.wanderer@vumc.org.

1. Cohn CS, Shaz BH: Warming up to cold-stored platelets. *ANESTHESIOLOGY* 2020; 133:1161–3
2. AABB: Highlights of transfusion medicine history. Available at: <http://www.aabb.org/tm/Pages/highlights.aspx>. Accessed September 27, 2020.
3. Duke WW: The relation of blood platelets to hemorrhagic disease description of a method for determining the bleeding time and coagulation time and report of three cases of hemorrhagic disease relieved by transfusion. *JAMA* 1910; 55:1185–92
4. Strandenes G, Sivertsen J, Bjerkvig CK, Fosse TK, Cap AP, del Junco DJ, Kristoffersen EK, Haaverstad R, Kvalheim V, Braathen H, Lunde THF, Hervig T, Hufthammer KO, Spinella PC, Apelseth TO: A pilot trial of platelets stored cold *versus* at room temperature for complex cardiothoracic surgery. *ANESTHESIOLOGY* 2020; 133:1173–83
